# Supplementary material for: Mechanism of Synergistic Photoinactivation Utilizing Curcumin and Lauric Arginate Ethyl Ester against Escherichia coli and Listeria innocua
Source: MDPI journal article supplement (doi:10.3390/foods12234195), 2023-11-21
Supplement: s1 [file s1]

**Supplementary Figure S1: Absorbance spectra of diluted curcumin-LAE micelle and its components**

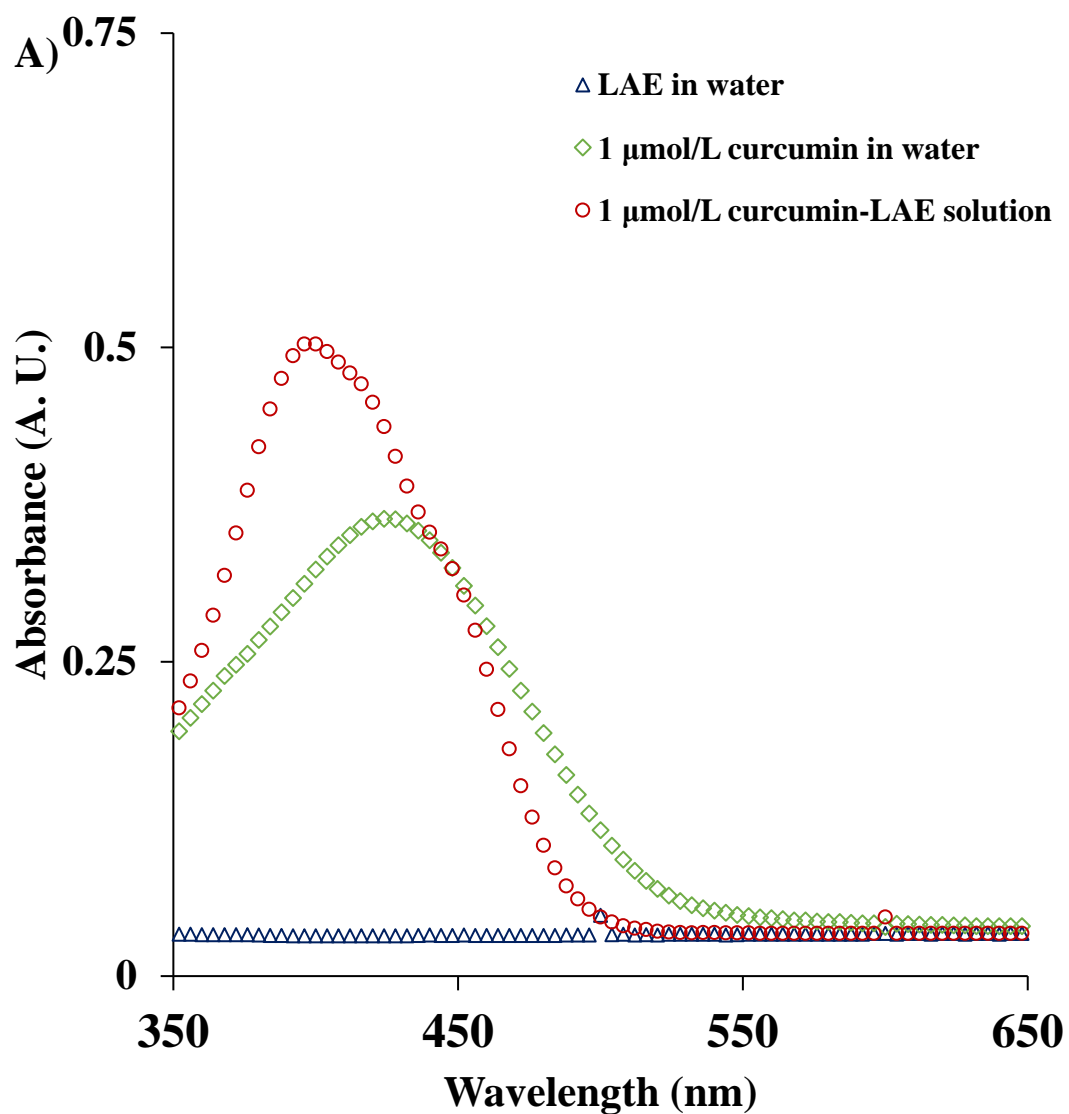

**Supplementary Figure S1.** Absorbance spectra of the diluted LAE micelles, unencapsulated curcumin in pH 3.5 water, and curcumin-LAE solution after 10 min.

Supplementary Figure S2: Stability of diluted curcumin-LAE micelle

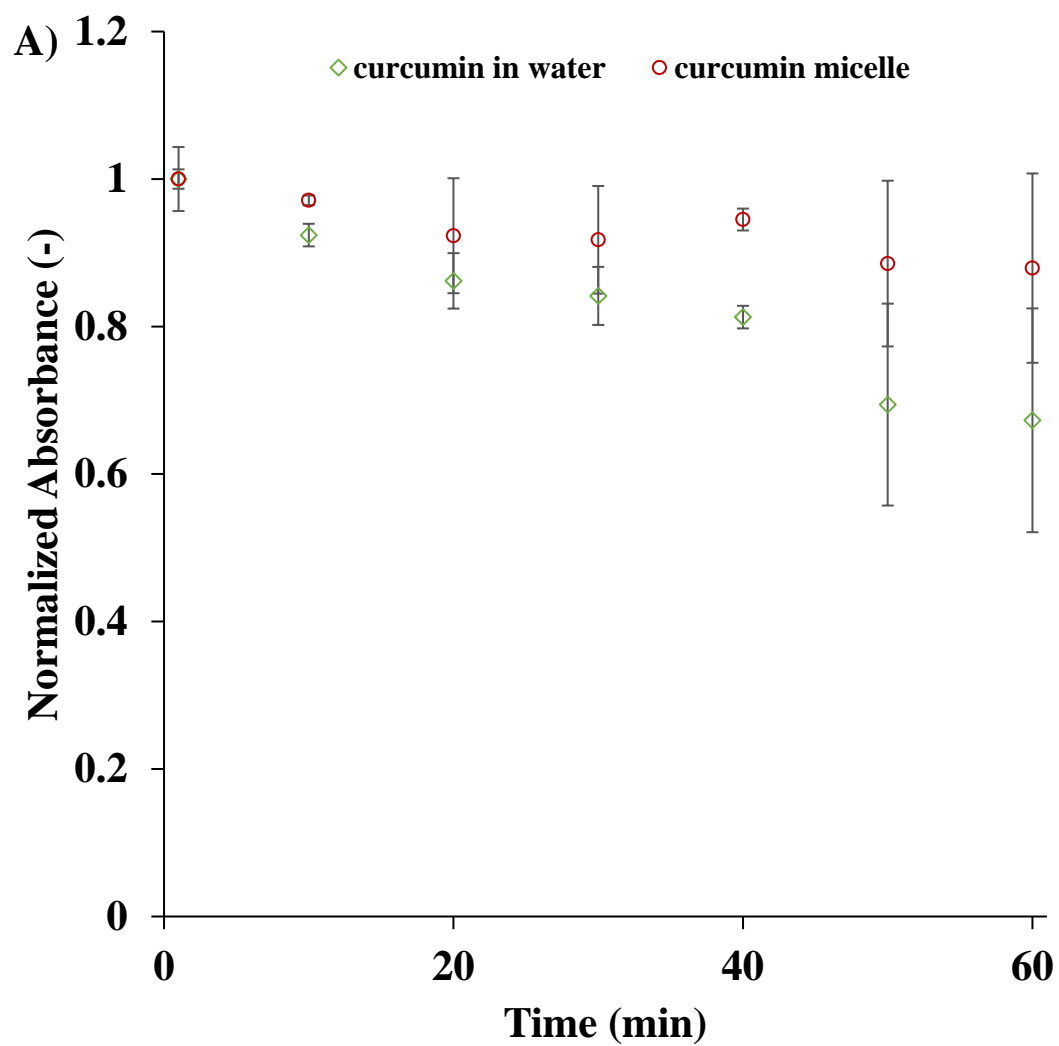

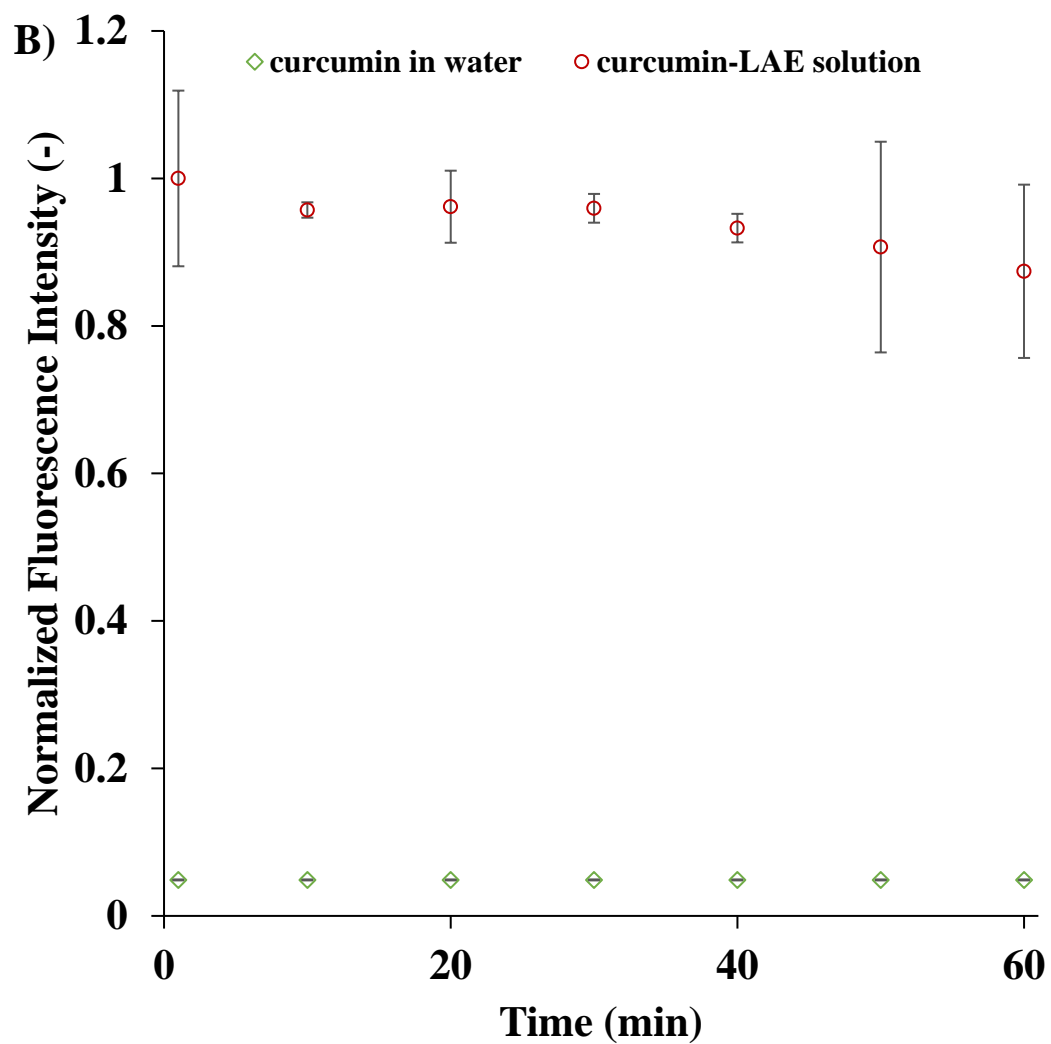

**Supplementary Figure S2.** A) Normalized absorbance (at 400 nm) and B) fluorescence emission intensity ( $\lambda_{\text{exc}}=365$  nm,  $\lambda_{\text{em}}=540$  nm) of diluted curcumin and curcumin-LAE solutions in water at pH 3.5 as a function of time.

**Supplementary Figure S3: SEM micrograph of treated *L. innocua* cocktail**

**A)**

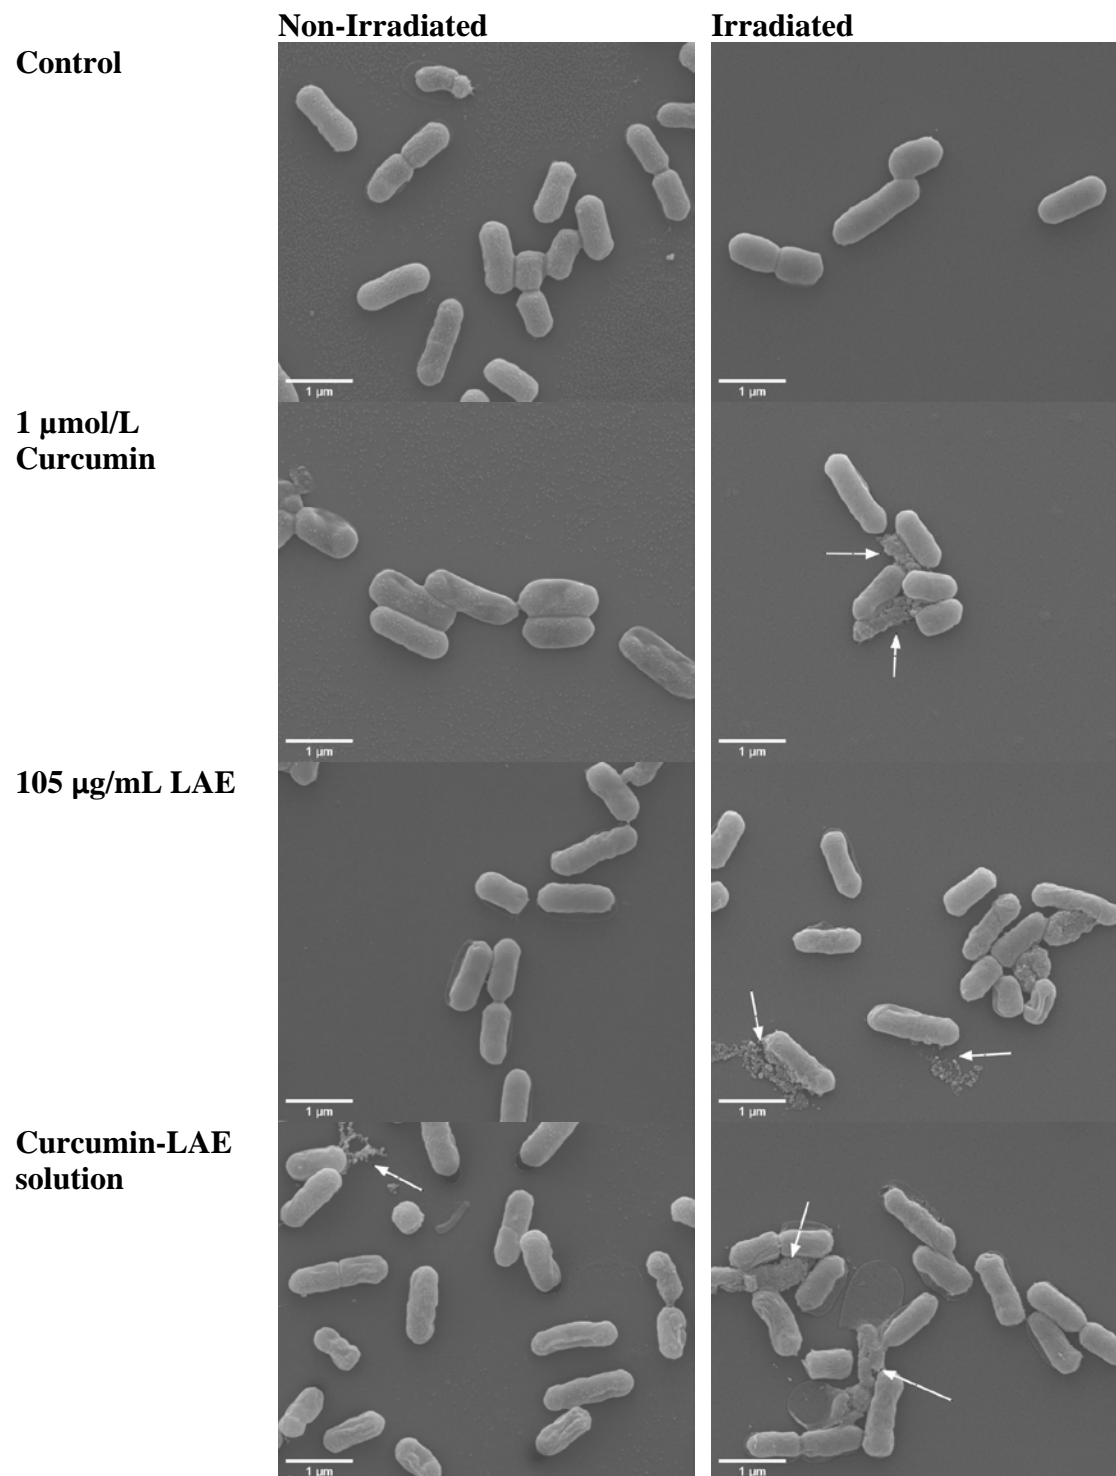

**B)**

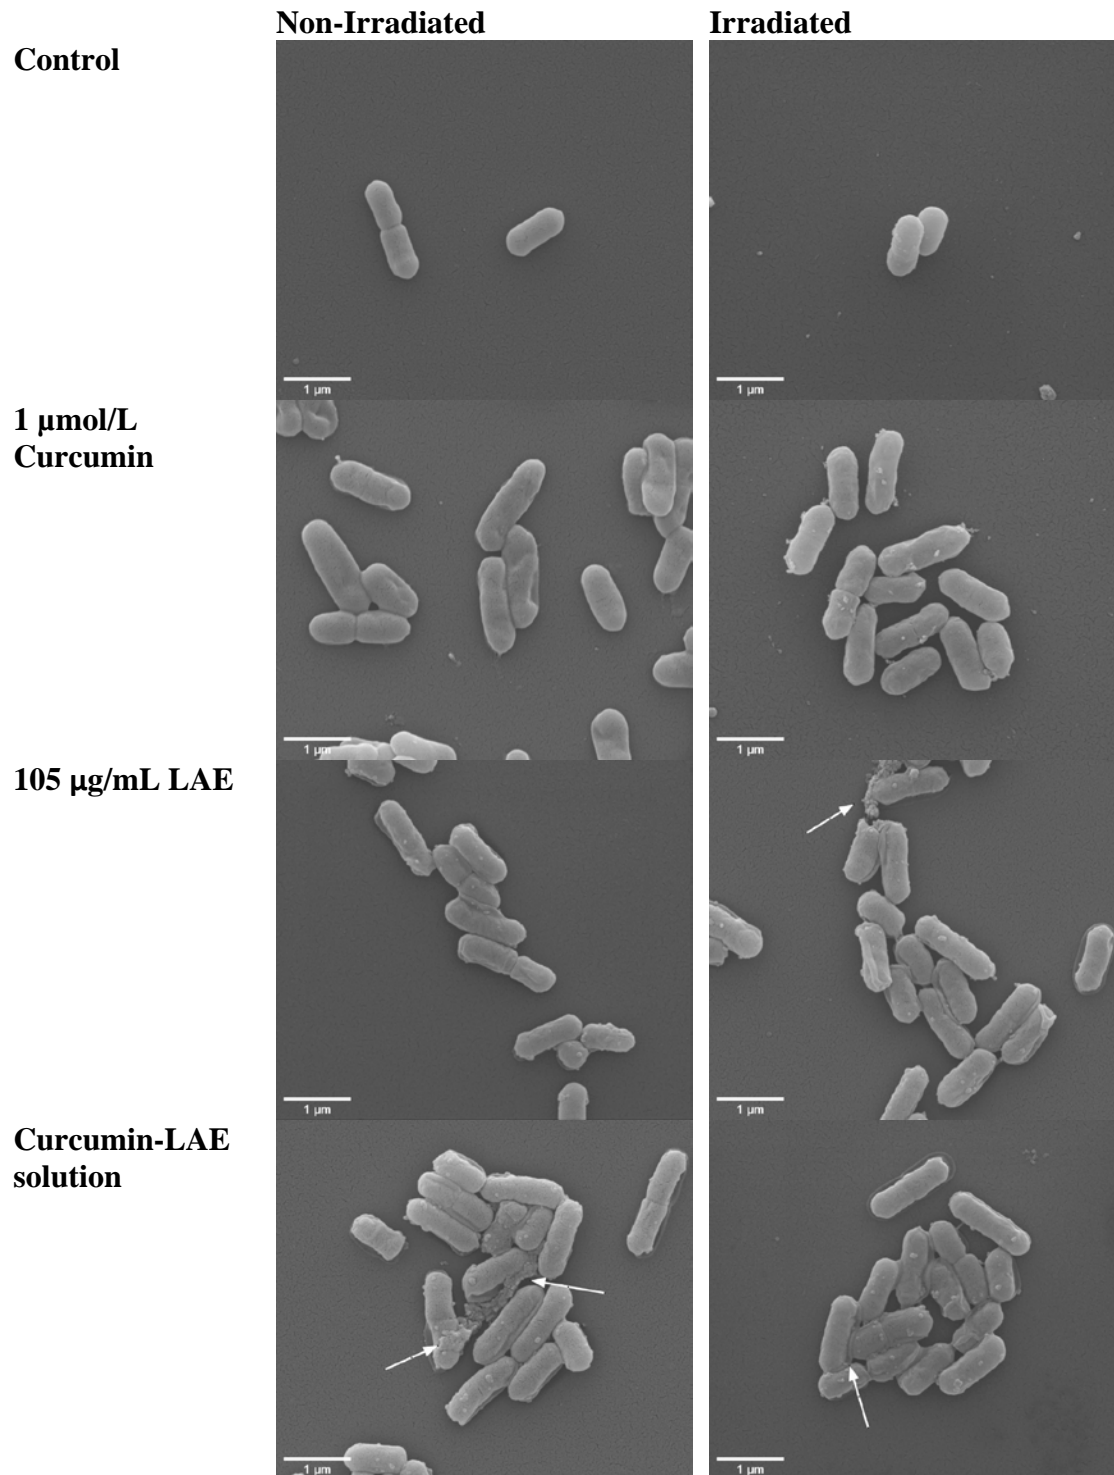

**Supplementary Figure S3.** SEM micrograph of non-irradiated and irradiated cocktail of *L. innocua* treated with curcumin, LAE, curcumin-LAE solutions at A) pH 3.5 and B) pH 7. The white arrows indicate damage and leakage from the cell.

**Supplementary Figure S4: TEM micrograph of treated *L. innocua* cocktail**

**A)**

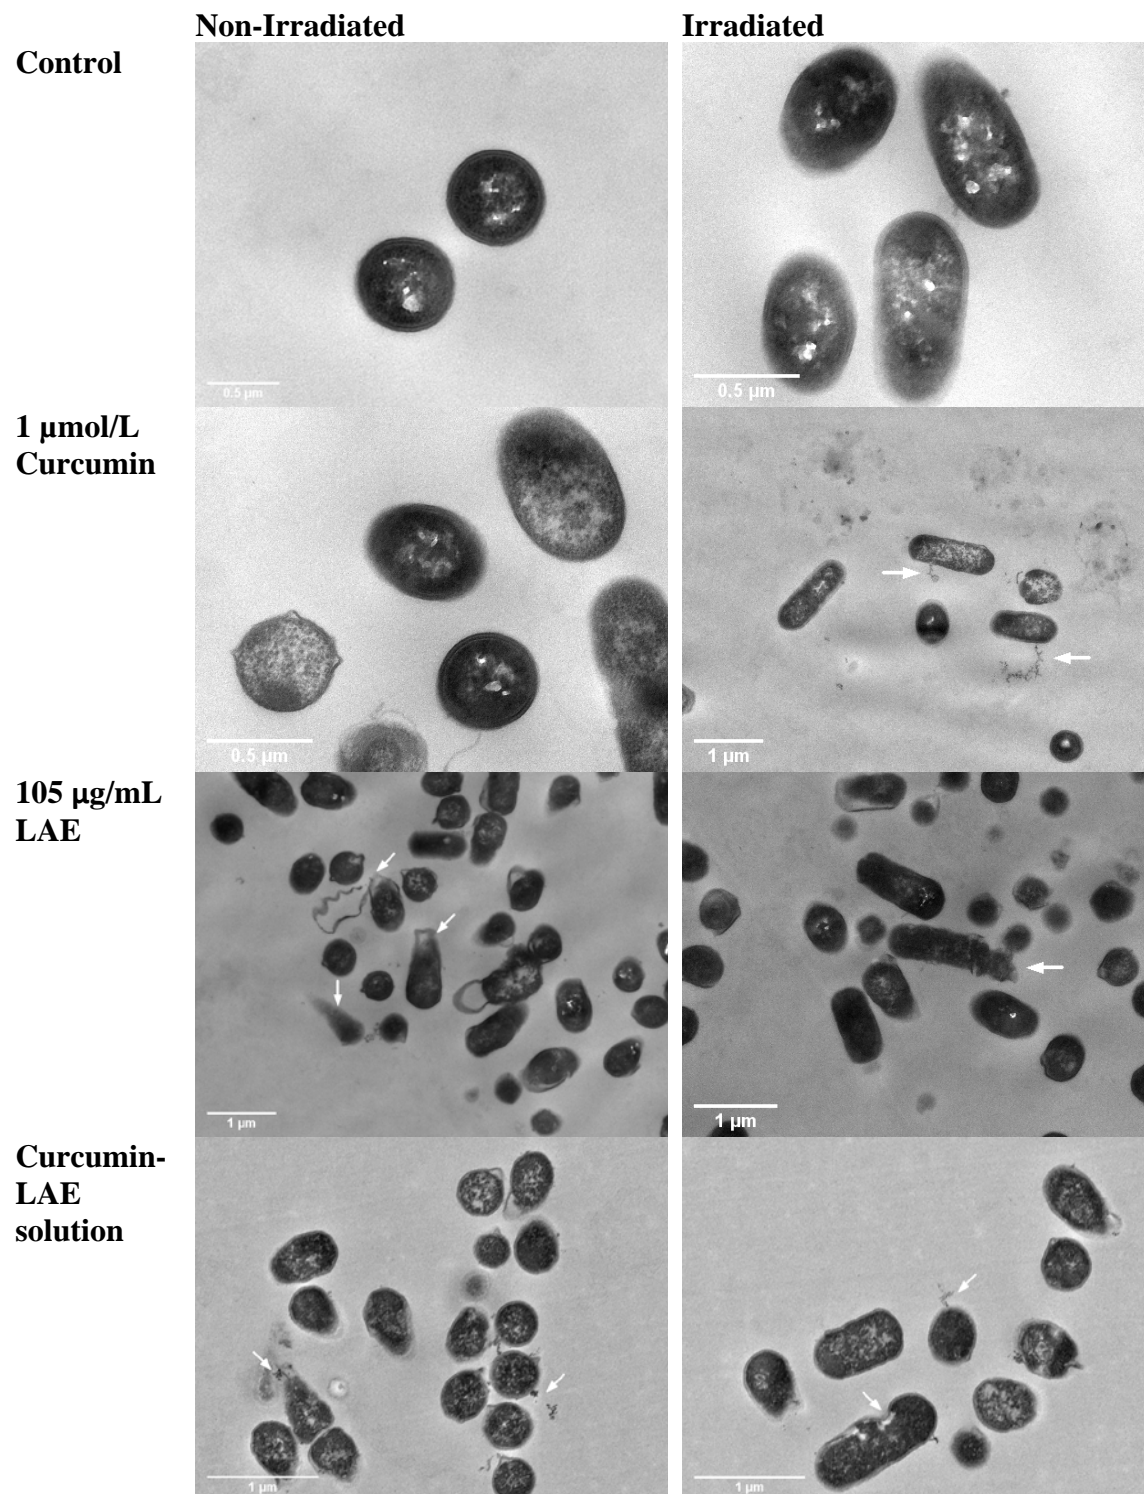

**B)**

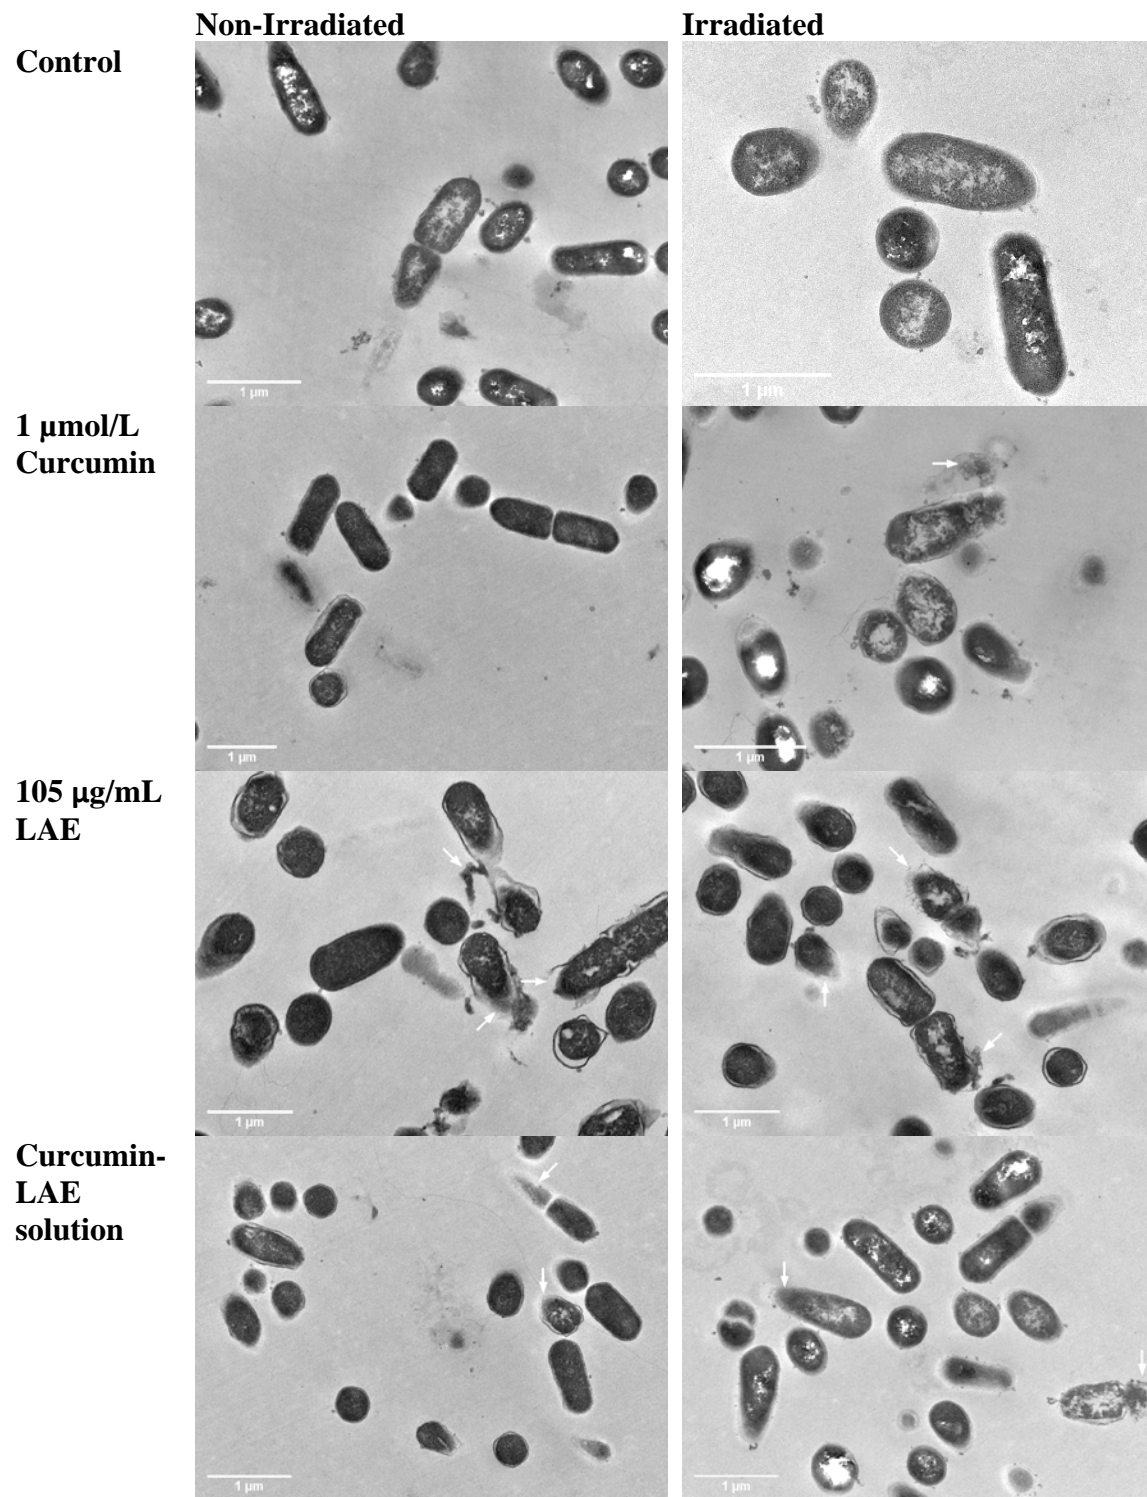

**Supplementary Figure S4.** TEM micrograph of non-irradiated and irradiated cocktail of *L. innocua* treated with curcumin, LAE, curcumin-LAE solutions at A) pH 3.5 and B) pH 7. The white arrows indicate dissolution of cellular membrane and leakage from the cell.

Supplementary Figure S5: live/dead cell assay of treated *L. innocua* cocktail

A)

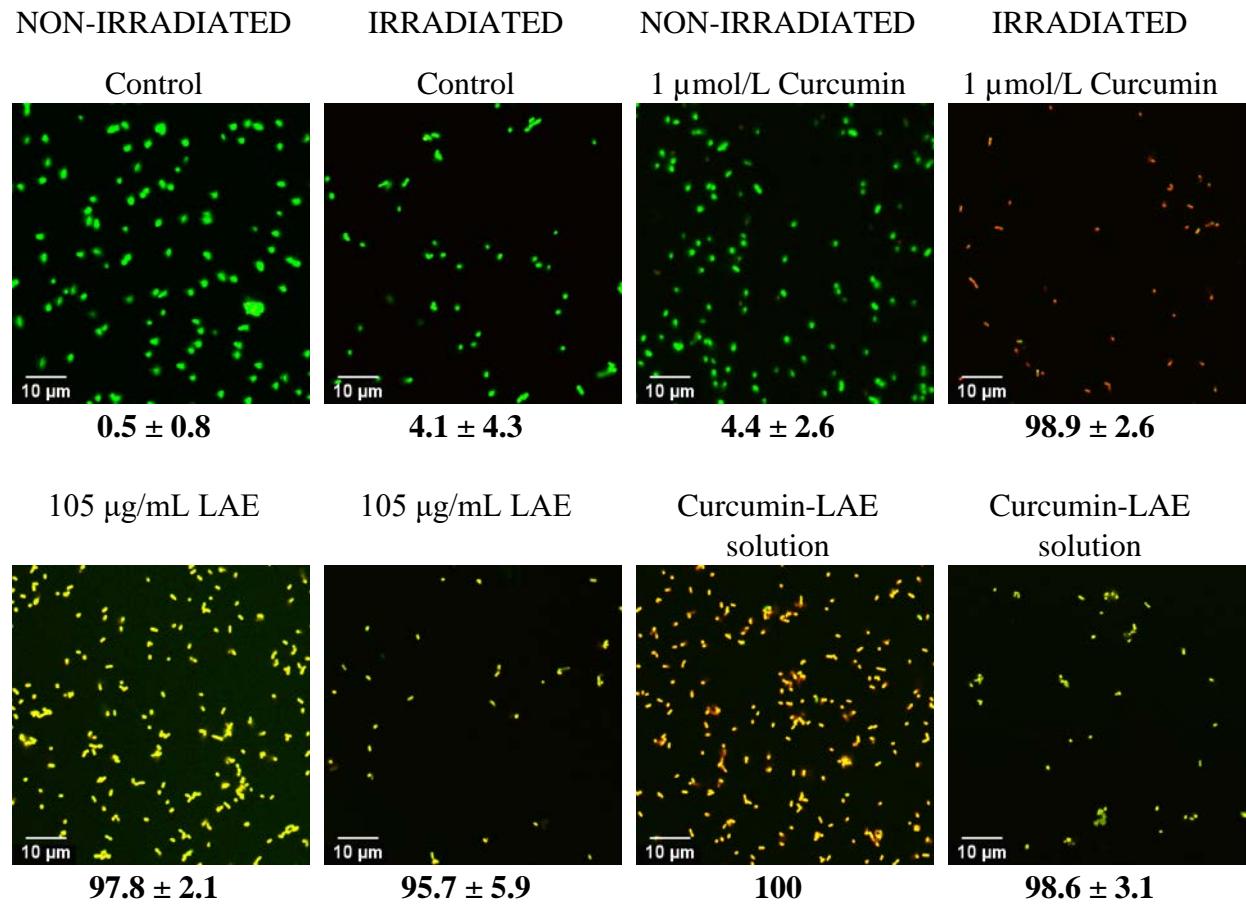



**B)**

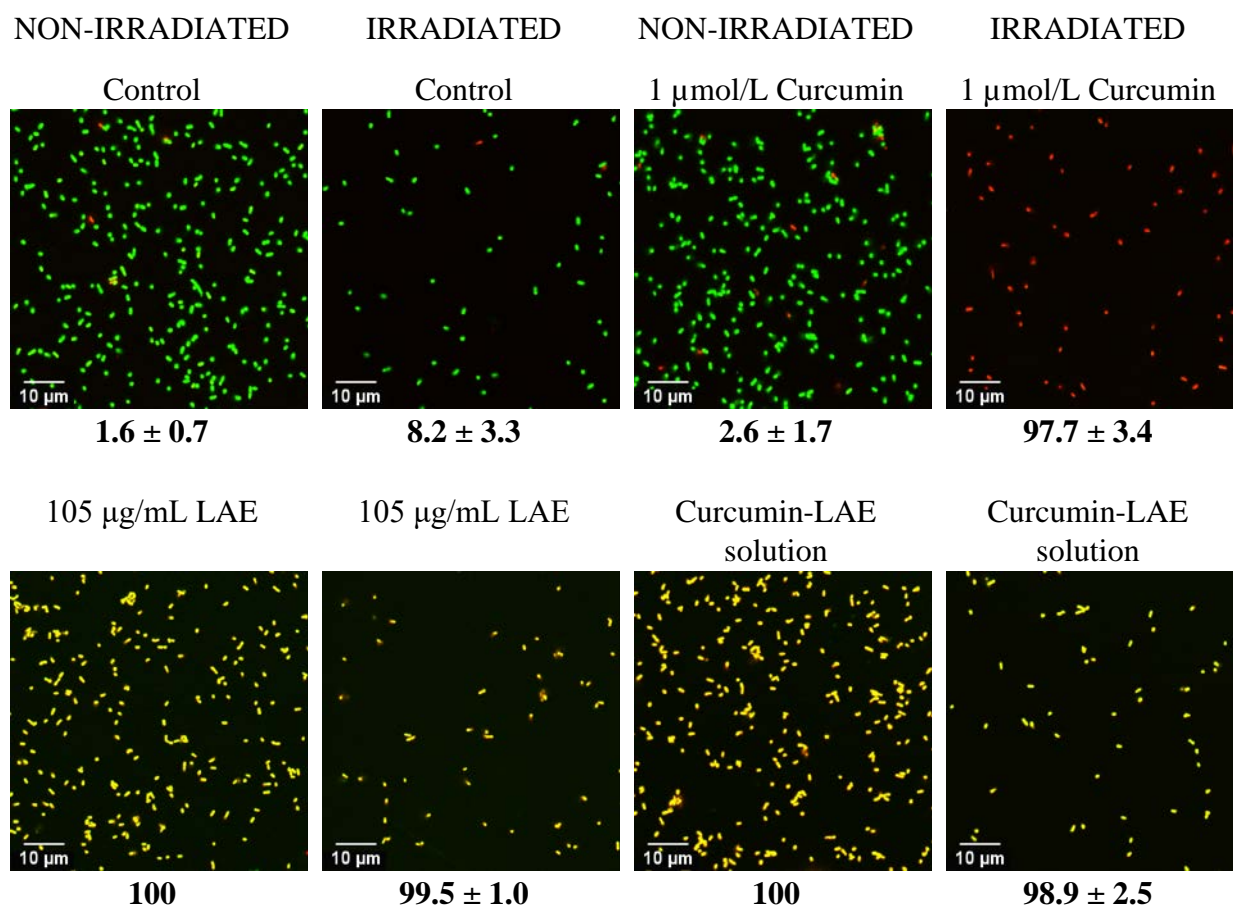

**Supplementary Figure S5.** Micrographs of non-irradiated and irradiated cocktail of *L. innocua* treated with curcumin, LAE, curcumin-LAE solutions at A) pH 3.5 and B) pH 7, stained with Syto9 (green) and propidium iodide (yellow, red). The percentage of cocktail of *L. innocua* at pH 3.5 or pH 7 with permeable membranes (yellow, red) is listed below each micrograph.
